# Supplementary material for: An assessment of multiple variables predicting the psychological effects of flooding: Case study in Peninsular Malaysia
Source: Copernicus journal article supplement (doi:10.5194/egusphere-2025-2917), 2025-07-14
Supplement: Supplementary file [file egusphere-2025-2917-RC3-supplement.pdf]

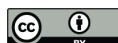

# **An assessment of multiple variables predicting the psychological effects of flooding: Case study in Peninsular Malaysia**

Shabir Ahmad Kabirzad\*<sup>1</sup>, Balqis M Rehan\*<sup>1</sup>, Zed Zulkafli<sup>1</sup>, Badronnisa Yusuf<sup>1</sup>, Bakti Hasan-Basri<sup>2</sup>, Mohd E Toriman<sup>3</sup>, Edmund C Penning-Rowell<sup>4</sup>

<sup>1</sup>Department of Civil Engineering, Faculty of Engineering, Universiti Putra Malaysia, 43400, Serdang, Selangor, Malaysia

<sup>2</sup>School of Economics, Finance and Banking, Universiti Utara Malaysia, Sintok, 06010, Kedah, Malaysia

<sup>3</sup>School of Social, Development and Environmental Studies, Faculty of Social Sciences and Humanities, Universiti Kebangsaan Malaysia, 43600, Bangi, Selangor, Malaysia

<sup>4</sup>School of Geography and the Environment, South Parks Road, OX1 3QY, Oxford, UK

\*Correspondence to: Balqis M. Rehan ([balqis@upm.edu.my](mailto:balqis@upm.edu.my))

## **ABSTRACT**

Floods are among the most disastrous environmental hazards, causing devastating tangible and intangible impacts. The psychological impact, which can be classified as intangible damage, is an important aspect of human's well-being. The psychological impact of flooding has begun to receive attention in recent years, but the complexity of measuring it makes it less attractive to be considered in actual flood damage and risk studies. The present study seeks to evaluate the psychological impact of flooding experienced by households and business premises and the different factors that could be the determining variables of the psychological impact. A total of 217 respondents have participated in the empirical face-to-face survey conducted in different vulnerable places in Peninsular Malaysia. Through the willingness-to-pay (WTP) method, only 107 and 34 respondents from residential and business premises, respectively, expressed their agreement to spend on flood risk reduction efforts. The study found that flood durations and family sizes are statistically significant contributors to intangible damages for households, reflecting the intangible damages to residential sector. The results suggest a greater investment to support affected people's welfare by improving community awareness and shelter facilities. These will enhance risk management efforts and reduce the psychological impacts to people at risk of flooding. The findings also revealed a key challenge: the inability to reliably infer intangible flood damages for business sectors through empirical evidence.

**Keywords:** Intangible damage, Flood psychological effect, Socioeconomic variables, Willingness-to-pay.

## **1. Introduction**

Flooding caused significant harm beyond immediate physical damage, causing long-lasting psychological effects on affected communities. Flood impact is increased by climate change, which increases the frequency and intensity of flooding, causing a psychological impact on residents. The psychological impact includes stress,

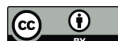

35 anxiety, fears, and worries, with vulnerable populations, particularly women, suffering greater effects (Salleh &  
36 Mustafa, 2016). **Historical event of flooding, like the 2014 disastrous flooding in Malaysia, highlights the**  
37 **extensive psychological impact on individuals and the community, underscoring the importance of intangible**  
38 **damage in flood risk assessment** (Ridzuan et al., 2022).

39  
40 Conventional flood risk models have primarily focused on tangible damages, such as physical and economic  
41 losses; however, psychological damages are frequently neglected. **This omission has resulted in an incomplete**  
42 **assessment of how floods affect the community's well-being.** Psychological impact is important to address to  
43 **achieve a more holistic understanding of flood impacts (e.g., Akhir et al., 2021).** For instance, studies have shown  
44 that communities with strong social networks and organized shelter systems experience less anxiety and stress  
45 during flood recovery periods (Zahari & Hashim, 2018). It is important to consider both tangible and intangible  
46 damage to better manage flood impacts.

47  
48 Flood risks and their impact are disproportionately spread across various socioeconomic groups. Elements such  
49 as building age, closeness to flood-prone areas, and family income levels play an important role in determining  
50 flood vulnerability (Fatemi et al., 2020). Vulnerable communities often live in poorly maintained homes,  
51 heightening the physical and psychological damage during floods. **Geographic factors, such as living closer to the**  
52 **river or in a low-lying zone, face severe flood impacts** (Yang et al., 2020). The socio-spatial inequalities require  
53 focused strategies that address both physical and social vulnerabilities.

54  
55 Recent advancement in flood risk assessment emphasizes the importance of integrating multiple variables to  
56 understand the interaction between flood characteristics, socioeconomic characteristics, building characteristics,  
57 and psychological effects. Research utilizing **the** multivariate methods has shown that assessing multiple  
58 variables, such as flood depth and building conditions, provides **a more precise evaluation** of community  
59 vulnerability and resilience (Hudson et al., 2017). This holistic approach assists in identifying important factors  
60 affecting both physical and psychological impacts, thereby improving disaster preparedness and recovery  
61 strategies (Foudi et al., 2017). **This study** has recommended models that capture these complex relationships to  
62 support more effective and fair policy-making.

63  
64 A comparison of flooding events across different periods reveals that the impact on both residential and business  
65 properties has intensified over time (Merz et al., 2010). Numerous studies have quantified the tangible damage to  
66 those **two type of properties** (Van Ootegem et al., 2015; Kabirzad et al., 2024). However, intangible damage to  
67 residential and business properties has often been overlooked due to challenges in assessment and valuation, as  
68 well as ethical and social complexities (Frangia et al., 2016; Nafari & Mendis, 2018, Babicky et al., 2021).  
69 Intangible damage is critical for understanding the full impact of floods on individuals and communities (Babicky  
70 et al., 2021). Research emphasizes that intangible flood damages can, in many cases, be more severe than tangible  
71 losses (Nga et al., 2018; Han et al., 2023). There remains a need for flood risk models that integrate physical,  
72 social, and psychological dimensions.

73

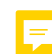

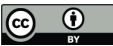

74 This study aims to assess intangible flood damage represented by the psychological effects of flooding  
75 experienced by households and businesses in Peninsular Malaysia. The contribution of multiple variables was  
76 analysed to gain insights into the factors governing the intangible losses. The multiple variables include flood  
77 characteristics, building/business/physical characteristics, and socioeconomic characteristics. The damage is  
78 quantified using the willingness-to-pay (WTP) approach based on the flooded area, and its relationship is assessed  
79 with a linear regression model.

80 **2. Methods**

81 This study defines intangible damage as psychological health impacts such as stress, emotional instability,

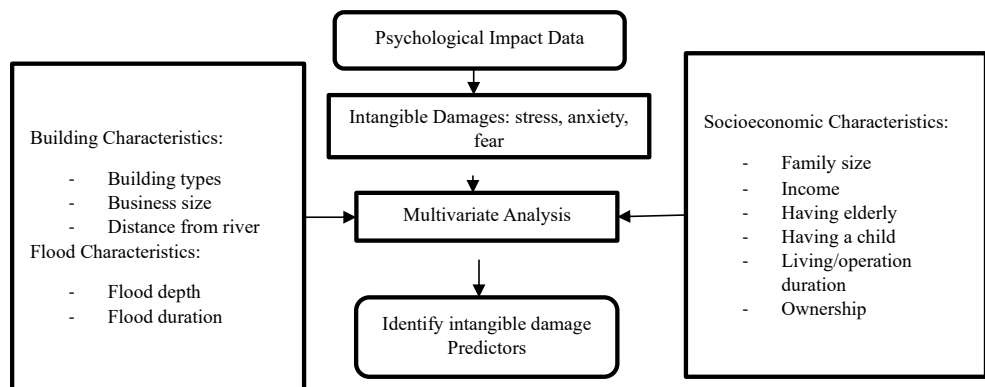

**Figure 1. The intangible damage assessment and the independent variables used in the multivariate analysis for the damage model.**

82 wariness, and anxiety that befall people exposed to flooding. Questionnaires and interviews were used to survey  
83 respondents and gather information on flood damage and its independent variables. Figure 1 shows briefly the  
84 methodology of this study. The dependent variables focused on intangible damages, while a total of eleven  
85 independent variables were considered: flood depth, flood duration, building type, proximity to water bodies,  
86 business type, household size, years of living/operation duration, ownership, income, and the presence of elderly  
87 individuals or children. Of the aforementioned variables, seven were specifically applied to business premises.  
88 The method applied to assess the non-market value of the intangible damage is the Contingent Valuation Method  
89 (CVM) through the willingness-to-pay (WTP) approach. Ultimately, a multivariate regression analysis was  
90 undertaken to identify the contributing factors to the intangible damage of residential and commercial premises.  
91 The data underwent outlier treatment using skewness and a three-standard-deviation cutoff, followed by necessary  
92 preparation before model fitting. To ensure no data fell outside the acceptable range, further cleaning was  
93 performed using the Mahalanobis distance method. This included transformations(e.g., Svenningsen et al., 2020)  
94 to accommodate non-Gaussian variables in their original form. For residential buildings, the datasets were log-  
95 log transformed, except for categorical independent variables such as building type, presence of elderly residents,  
96 presence of children, and ownership status. For commercial buildings, the datasets remained untransformed  
97 (except for income data, which was log-transformed), as the other variables met Gaussian distribution criteria.  
98 Microbusinesses were defined as those with fewer than five employees, while small-to-medium enterprises  
99 (SMEs) were classified as having up to

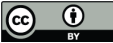

100     **2.1. Study Area and Respondents**

101     Approximately 10% of Peninsular Malaysia is vulnerable to flooding, impacting 21% of the total population  
102     (Department of Drainage and Irrigation, 2012). Survey locations were identified through a rigorous review of  
103     authorized documents and reports, such as those published by the Department of Irrigation and Drainage (2012),  
104     Kuala Lumpur City Hall (2015), and the National Statistics Department. Grey literature and open-source websites  
105     were also consulted to verify and supplement case study area selection. Figure 2 displays the study sites where  
106     the data were collected: Kuala Lumpur Federal Territory, Selangor, and Kelantan states. In Kuala Lumpur, the  
107     Segambut area was chosen because of its history of frequent flooding and significant past evacuations. In  
108     Selangor, survey locations included Kajang and Dengkil, where previous flood events had led to large-scale  
109     evacuations. Surveys were conducted in 2020 across various locations. Each respondent was approached  
110     individually at their residential or business premises, where only those who had lived in the flood-affected areas  
111     within the last ten years and had experience of flooding.

112

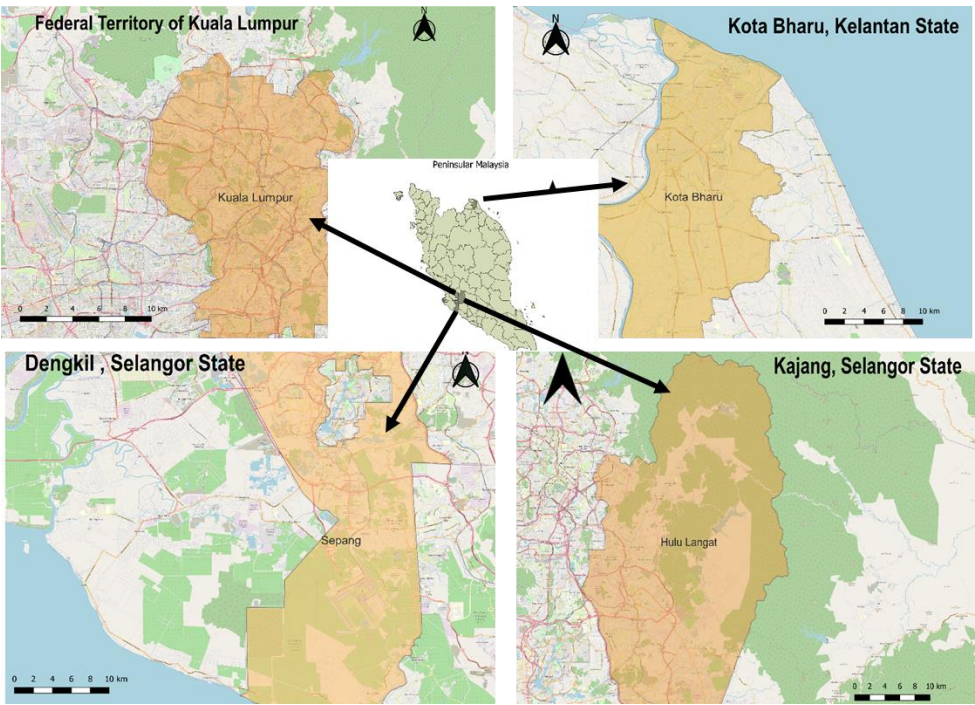

113

114     **Figure 2.** Areas where surveys were conducted in Peninsular Malaysia, and the yellow area is the district or territory  
115     boundaries. Top left: Kuala Lumpur Federal Territory; Top right: Kota Bharu district, Kelantan; Bottom left:  
116     Dengkil, Sepang district, Selangor; Bottom right: Hulu Langat district, Selangor (© OpenStreetMap 2024).  
117     Distributed under the open Data Commons Open Database License (ODbl) v1.0.

118

119     Within the capacity of the study, 380 face-to-face interviews were successfully conducted. From the total, 217  
120     were valid responses. Out of the 217 respondents, only 141 (107 residential and 34 businesses) expressed  
121     willingness to pay for disaster risk reduction measures to reduce their psychological distress. The remaining 76

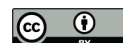

respondents denied the willingness to pay due to different reasons. Table 1 shows the number of buildings, both residential and business, where households and business owners were interviewed. ~~Forty-two percent~~ of residential respondents and 67% of business respondents were from the Kota Bharu (Kelantan) study area, where terrace buildings constituted the majority, accounting for almost 40% of the total, followed by low-cost houses. The respondents from the Segambut district of Kuala Lumpur were **minimal**, mostly living in terraces and low-cost houses. This indicates that respondents from the Kajang and Dengkil area of Selangor and the Kota Bharu district of Kelantan reside in terrace building types. In the business premises, the predominant type of businesses were micro-sized enterprises, followed by small-medium-sized businesses. The Kota Bharu study site recorded the highest flood depth for both residential and commercial buildings, attributed to a significant flooding event in 2014. The case study sites and flooding events occurred in different years, but these locations have experienced severe flooding over the past decade, affecting both residential and business.

**Table 1. Summary of the respondents in residential and business premises categories across the study sites**

| Study Site                   | Respondents' flood-year experiences | Residential building type |          |          |           | Business Type |              |          |
|------------------------------|-------------------------------------|---------------------------|----------|----------|-----------|---------------|--------------|----------|
|                              |                                     | Bungalow                  | Terrace  | low-cost | Total     | Micro         | Small-medium | Total    |
| <b>Segambut</b>              | 2010-2020                           | 2                         | 8        | 17       | 27        | 2             | 2            | 4        |
| <b>Kajang &amp; Dengkil</b>  | 2020                                | 5                         | 21       | 9        | 35        | 6             | 1            | 7        |
| <b>Kota Bharu</b>            | 2014                                | 16                        | 14       | 15       | 45        | 18            | 5            | 23       |
| <b>Total respondents (%)</b> | Sample size                         | 23 (21%)                  | 43 (40%) | 41 (38%) | 107 (100) | 26(76%)       | 8(24%)       | 34 (100) |

Most respondents were from residential buildings, with fewer businesses represented due to limited commercial activity in the surveyed regions. Engaging with the business sector was challenging because of their demanding schedules. Additionally, some retailers and service shops had relocated to safer areas. During the interviews, efforts were made to ensure that the cost of intangible losses was accurately estimated. **First, household heads, business managers, and owners in the exposed area to flooding were asked about the psychological impact they faced during previous flood events. After listening to their description, they were then explained about the effects of stress, wariness, and the various flood mitigation efforts that can help reduce flood impacts that their facing. Despite the efforts, getting the respondents' positive response to the issue and in valuing the psychological impacts proved to be challenging and even sensitive to some. When they were asked about their willingness to contribute monetarily to safeguard themselves from the psychological effects by flooding, some expressed their contribute, and others did not. Respondents also shared their reasons for not contributing, such as: "I do not have enough income," "It is the government's responsibility," "I cannot trust anyone," and "The flood impact is not very severe"** The survey evaluated various factors essential for assessing flood-related intangible damage.

## **2.2. Relation of income and business size with WTP**



The present study elicited the monetary value of psychological impact from respondents to better understand and address future flood impacts. The elicited value is assumed to represent the economic value of the health impact, based on respondents' flooding experiences and their recollection of its effects on their health. This value is presented as an absolute figure in US dollars (US\$) for each flood event. Furthermore, the results were adjusted for the inflation rate using the Malaysian Consumer Price Index calculator to maintain consistency and comparability across different periods (Malaysia CPI Inflation Calculator, 2021).

In order to assess how the monetary value of WTPs varies according to income categories and business sizes, samples were sorted according to income levels and business sizes of respondents. Residents were divided into three socio-economic groups: B40 (bottom 40%), M40 (middle 40%), and T20 (top 20%). The B40 group included those earning less than US\$1130<sup>1</sup> per month, the M40 group covered incomes between US\$1130 and US\$2553.45 per month, and the T20 group consisted of households earning more than US\$2553.45 per month. This classification followed national standards and previous research (e.g. Kabirzad et al., 2024), but remains open to revision as socio-economic conditions change (Department of Statistics Malaysia, 2020). Businesses were categorized into micro and small businesses based on the number of full-time permanent employees. Micro businesses were defined as having fewer than five employees, while small businesses included those with five to thirty employees (SME Corporation Malaysia, 2022).

The data visualization methods, such as bar charts, were used to analyse patterns of flood exposure and the extent of damage across different income groups. The study concentrated on assessing whether lower-income households and small businesses suffered high risks and greater intangible losses, especially in terms of psychological health effects and interruptions to business operations. The result aimed to offer empirical evidence to target flood mitigation measures and mental health assistance for at-risk communities.

### 2.3. Regression Analysis and Model Specification

A multivariate regression analysis was performed to explore the relationship between flood intangible impacts and multiple factors. Samples were treated based on statistical assessments of skewness and standard deviation, where outliers with extreme values were winsorized, before the regression. The data was also transformed (e.g., Svenningsen et al., 2020) to accommodate non-Gaussian variables in their original form. For residential buildings, the dependent and independent variables were log-transformed, except for categorical independent variables, such as building type, presence of elderly residents, presence of children, and ownership status. For commercial buildings, only the income variable was log-transformed, and other variables met the Gaussian distribution criteria.

The regression models produced coefficients for all significant variables, with equations designed to assess predictors of intangible flood damages. These models enabled the identification of key factors contributing to damage severity among different socio-economic groups (Lee, 2020). The regression analyses related to statistical

<sup>1</sup>US\$ values have been exchanged from Malaysian currency (MYR) used in the Survey(s).





185 significance for this study employed different significance thresholds, such as 5% or 1 % (e.g., Lamond et al.,  
186 2015).

187

188 The regression models included both categorical and continuous variables to conduct a thorough analysis of the  
189 variables impacting intangible damage (Table 2). Variables such as building and household attributes, including  
190 size and distance from rivers, were assessed alongside socioeconomic indicators like income and length of  
191 residence (Kabirzad et al., 2024). The goal of the analysis was to identify predictors that significantly influenced  
192 the psychological condition of respondents in the face of flood events.

193 **Table 2. The independent variables were used in the multiple regression assessment.**

| Explanatory Variables                            | Description                                                                                                               | Multivariate analysis                                             |
|--------------------------------------------------|---------------------------------------------------------------------------------------------------------------------------|-------------------------------------------------------------------|
| <b>Flood characteristics</b>                     |                                                                                                                           |                                                                   |
| Flood depth                                      | Water depth inside the building from the ground floor, range residential (0.3-2m), business (0.3-1.6m)                    | Continuous variable                                               |
| Flood duration                                   | Water duration stays around the house during the day, ranging (1-14 days)                                                 | Continuous variable                                               |
| <b>Building or business characteristics</b>      |                                                                                                                           |                                                                   |
| Building type (low-cost type, Terrace, Bungalow) | Low-cost, terrace or bungalow                                                                                             | Dummy variable (Low-cost house = 0, Terrace & bungalow =1)        |
| Business size                                    | The micro or small-medium business premise                                                                                | Dummy variable (Micro = 0, Small to medium = 1)                   |
| Distance from River                              | Distance of building from the fluvial flood stream, residential(15-1307m) and business(5-1250m)                           | Continuous variable (meter)                                       |
| <b>Socioeconomic conditions</b>                  |                                                                                                                           |                                                                   |
| Family Size                                      | Number of members in the household or family(1- 12 persons)                                                               | Continuous variable                                               |
| Ownership                                        | Tenant or owner                                                                                                           | Dummy variable (Tenant = 0, Owner=1)                              |
| Income (family/Business)                         | Average monthly income per household or revenue per premise of residential (MYR500-10,000) and commercial (MYR500-20,000) | Continuous variable                                               |
| Year of living or business operation duration    | Number of years the respondent lives in the area or operated a business in the area (1-64Yrs).                            | Continuous variable                                               |
| Having children                                  | With children or not.                                                                                                     | Dummy variable (Without children under 14 years old = 0, with =1) |



|     | Having elderlies                                                                                                      | Households with the elderly. | Dummy variable (Without elderly<br>above 65 years old = 0, with =1) |
|-----|-----------------------------------------------------------------------------------------------------------------------|------------------------------|---------------------------------------------------------------------|
| 194 |                                                                                                                       |                              |                                                                     |
| 195 | Independent variables were assessed for multicollinearity, and the regression model confirmed that the models         |                              |                                                                     |
| 196 | met statistical assumptions. Standardized coefficients were utilized to determine the relative significance of each   |                              |                                                                     |
| 197 | predicting variable, allowing for a comparison of their effects on intangible damages. The final models include       |                              |                                                                     |
| 198 | error terms to address unexplained variations. These models were expressed as general equations, encompassing         |                              |                                                                     |
| 199 | all essential variables to ensure reproducibility for future research investigating flood impacts in comparable       |                              |                                                                     |
| 200 | settings (Svenningsen et al., 2020).                                                                                  |                              |                                                                     |
| 201 | <b>3. Results</b>                                                                                                     |                              |                                                                     |
| 202 | The results are presented in two parts: The first is to understand the variations of monetary intangible losses over  |                              |                                                                     |
| 203 | the determinant variables, and the second is on the analysis of multiple regressions.                                 |                              |                                                                     |
| 204 | <b>3.1. Intangible Damages Variations over Determinant Variables</b>                                                  |                              |                                                                     |
| 205 | Intangible damages variations from the residential sector were analysed according to income groups and intangible     |                              |                                                                     |
| 206 | flood damages. The results show that most respondents with flood experiences are in the bottom 40% (B40)              |                              |                                                                     |
| 207 | income group, highlighting their vulnerability to floods. The middle 40% (M40) income group has the second-           |                              |                                                                     |
| 208 | highest exposure level, while the top 20% (T20) group demonstrates significantly lower exposure. Additionally,        |                              |                                                                     |
| 209 | the sample sizes for the M40 and T20 groups are far smaller than for the B40 group. For instance, there are only      |                              |                                                                     |
| 210 | 13 and 5 respondents from the M40 and T20 groups, respectively, compared to the B40 group. The B40 group              |                              |                                                                     |
| 211 | incurred relatively higher total damages than the other income groups. However, the average damages across all        |                              |                                                                     |
| 212 | income groups for intangible losses are within the range of USD 46.6-186.4, as shown in Figure 3                      |                              |                                                                     |
| 213 | <del>Reference source not found.</del> The maximum value is from the T20 group, reflecting a larger contribution from |                              |                                                                     |
| 214 | high-income households. Interestingly, the B40 group shows slightly lower average damages than the other              |                              |                                                                     |
| 215 | income groups. This is opposed to findings from another study, which observed that high-income households             |                              |                                                                     |
| 216 | typically incur less damage (Abdullah et al., 2019).                                                                  |                              |                                                                     |



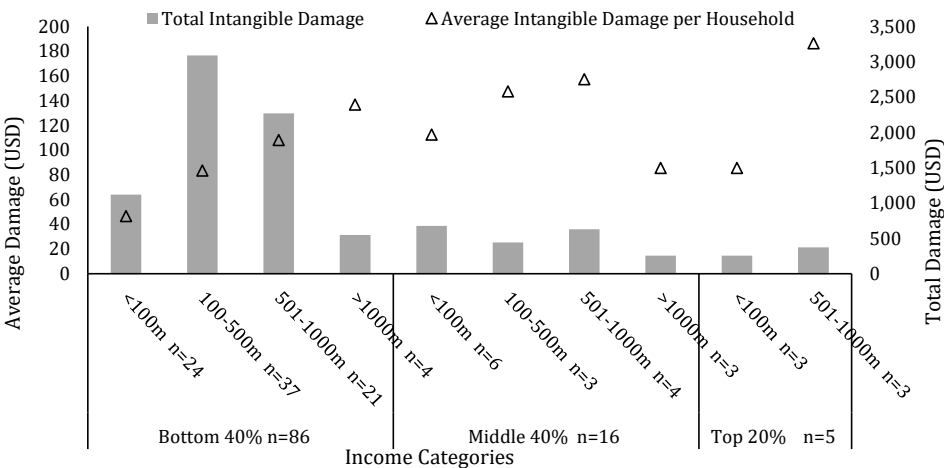

217  
218 **Figure 3. A comparison of the total and average values of intangible damages was conducted across income groups,**  
219 **distance-from-river categories, and the number of samples (n).**

220  
221 Figure 4 illustrates the total and average damages reported by respondents from the business sector, categorized  
222 by the size of their business premises. The results indicate that micro-sized businesses incurred relatively higher  
223 total damages than small-medium-sized businesses. This finding is supported by Kreibich et al. (2010), which  
224 suggests that micro-sized businesses implement fewer precautionary measures to mitigate asset damage, making  
225 them more susceptible to higher damages. It is worth noting that the magnitude of intangible damage for small-  
226 medium-size businesses could vary if a larger proportion of respondents were from this category. Additionally,  
227 micro-sized businesses experienced higher damage per premises unit, with most of these businesses located  
228 between 501 and 1,000 meters from the flooding source.

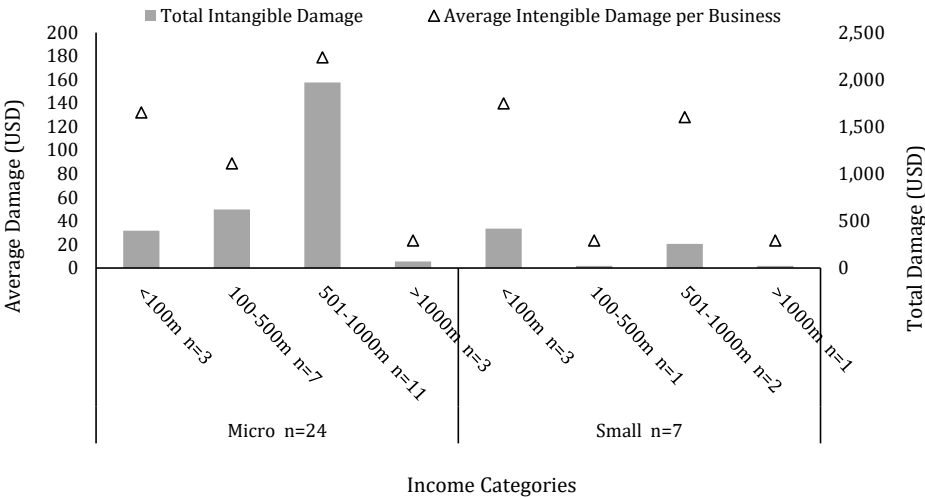

229  
230 **Figure 4. Intangible damage assessment of business premises considering income categories, distance from the**  
231 **river, and the number of samples (n)**

232  
233 When comparing residential and business losses, residential properties suffered more intangible damages. This  
234 reflects their increased susceptibility to flooding, as highlighted in the Department of Statistics' Special Report on  
235 flood damages (Prime Minister Department, 2022).

236 **3.2. Multiple Regression Analysis of Intangible Damages**

237 The results for multiple regression of the considered factors with intangible damages are distinguished between  
238 the residential sector and the business sector.

239 **3.2.1. Residential Building Intangible Damage Regression Analysis**

240 Table 3 presents the correlation matrix, which examines the relationship between intangible damage and each  
241 independent variable in terms of direction and strength. The results indicate that there is an association between  
242 intangible damage and the explanatory factors considered for households. The majority of the variables exhibited  
243 positive correlations with varying levels of statistical significance, as indicated by the correlation coefficients. In  
244 the case of intangible damage, three explanatory factors were statistically significant **at a 10% significance level.**  
245 These factors include flood duration, household family size, and building type. Flood duration and family size  
246 variables are statistically significant at the 5% significance level, while building type demonstrates statistical  
247 significance at the 10% level.

248  
249 **Table 3. Correlation matrix of flood intangible damages to households with damage predictors.**

|                   | IntD | FD | FDu | BT | DfR | HC | HE | Ow | FS | Inc |
|-------------------|------|----|-----|----|-----|----|----|----|----|-----|
| Intangible damage | 1    |    |     |    |     |    |    |    |    |     |
| IntD              |      |    |     |    |     |    |    |    |    |     |



### Characteristics of flood

Log (Flood depth) .131

FD 1

Log (Flood .291\*\*\* .171 1

duration) FDu<sup>a</sup> \*

### Characteristics of Building

Building Type BT .163\* .013 .128 1

Log (Distance .123 .172\* .667\*\*\* .257\*\*\* 1

from River) DfR<sup>a</sup>

### Socioeconomic characteristics

Having children .075 .023 -.230\*\* -.102 -.340\*\*\* 1

HC

Having elderly HE -.029 .121 .089 .021 .102 -.172 1

Ownership Ow -.037 .100 .071 .018 .023 -.013 .159 1

Log(Family size) .262\*\*\* -.071 -.004 -.082 -.114 .383\*\*\* -.031 -.260 1

FS

Log(Income)Inc .151 -.108 -.168\* .304\*\*\* -.072 .138 .044 .038 .114 1

Log(Living -.049 .059 .057 -.321\*\*\* -.104 .094 .173 .403\*\*\* .214\*\* -.152

duration) LDu

Note: \*. Correlation is significant at the 0.1

\*\*. Correlation is significant at the 0.05

\*\*\*. Correlation is significant at the 0.01

<sup>a</sup> Distance from the river and living duration variables have multicollinearity issues

250

251 The intuitive nature of their positive correlation is evident. As flood duration increases, there is an associated  
252 increase in intangible damage. Other studies found that, in addition to flood depth, other variables, such as building  
253 type and ownership, are correlated (Babcicky et al., 2021). There also appears to be a positive association between  
254 the type of building and the intangible damage caused by flooding. Another study by Lamond et al. (2015) showed  
255 that household income correlated with stress or mental impact. The finding argued by (Babcicky et al., 2021) that  
256 income and building type have a negative correlation. Individuals of lower socio-economic status residing in  
257 proximity to the river demonstrated relatively higher vulnerability but possessed fewer material belongings.  
258 Consequently, they may experience comparatively lower losses to the residences.

259

260 The regression analysis on intangible damage shows the presence of multicollinearity among the two independent  
261 factors: flood duration and distance from the river. The presence of multicollinearity poses significant concerns  
262 about the precision of the results. Therefore, the omission of distance from the river was necessary to improve  
263 both the accuracy and reliability of the results obtained from the regression analysis. From the remaining  
264 independent factors considered, two variables, namely flood duration and family size, present a statistically  
265 significant regression in relation to intangible damage.

266

267 Another study illustrated that flood duration is not statistically significant with mental health; however, flood  
268 depth is statistically significant in the regression model (Lamond et al., 2015).

269 The regression analysis results in Table 4 indicate that among the components examined, two variables, flood  
270 duration and family size, significantly influence the outcomes of the multivariate flood study.



271

272 **Table 4. Intangible damage multiple regression results for the residential sector. Variables statistically significant at**  
 273 **a 10% significance level for intangible damages are included.**

| Residential Sector            |                                          |                   |         |                                  |
|-------------------------------|------------------------------------------|-------------------|---------|----------------------------------|
| Explanatory variables         | Intangible damage<br>(R-squared = 0.231) |                   |         |                                  |
|                               | Unstandardized<br>Coefficient<br>B       | Standard<br>Error | p-value | Standardized<br>Coefficient<br>β |
| Characteristics of flood      |                                          |                   |         |                                  |
| Log (Flood duration)          | 0.486                                    | 0.156             | 0.002   | 0.299                            |
|                               | 1.12 <sup>a</sup>                        |                   |         |                                  |
| Socioeconomic characteristics |                                          |                   |         |                                  |
| Log (Family size)             | 0.65                                     | 0.222             | 0.004   | .301                             |
|                               | 1.50 <sup>a</sup>                        |                   |         |                                  |

274

275 The coefficient of determination (R<sup>2</sup>) indicates the degree of accuracy of the regression analysis, specifically for  
 276 intangible damage, with a value of 0.23. However, the physical and socio-economic variables R<sup>2</sup> is lower than  
 277 20% without flood perceiving probability (Babcicky et al., 2021). The acceptability of this value is acknowledged  
 278 for intangible damage, as other studies have reported similar findings, such as an R<sup>2</sup> value close to 25% (Wijayanti  
 279 et al., 2017).

280

281 Correlation results indicated a positive relationship between flood duration and intangible damage, as well as  
 282 between family size and damage. Flood duration and intangible flood damage were positively correlated (Lamond  
 283 et al., 2015). Specifically, a 1% increase in flood duration is associated with a 1.12% increase in willingness-to-  
 284 pay. The flood duration is a key parameter in quantitative evaluations of health impacts caused by flooding. The  
 285 regression results demonstrated that a 1% increase in family size is associated with a proportional rise of 1.5% in  
 286 intangible damage. For example, adding an individual to a household can lead to a relative increase in intangible  
 287 damage of approximately 12.50%. Larger families experienced more intangible impacts due to the increased  
 288 willingness-to-pay associated with healthcare interventions.

### 289 3.2.2. Business Premises Intangible Damages Regression Analysis

290 Analyses were conducted on intangible flood damage to businesses through correlation and regression analysis.  
 291 The analysis of intangible damage over the seven independent variables, presented in Table 5. In the correlational  
 292 analysis, the factors of years of business operation and income were statistically significant in describing the  
 293 intangible damage, with a p-value of 0.1. The interaction between flood duration and the length of time (years) a  
 294 company's operation suggests a significant interrelationship between these two variables. Consequently, the flood  
 295 duration was excluded from the multiple regression analysis.

296



Table 5. Correlation matrix of flood intangible damages to business with damage predictors

|                                       | IntD   | FD      | FDu     | BS    | DfR    | Ow   | YBO   | Inc |
|---------------------------------------|--------|---------|---------|-------|--------|------|-------|-----|
| <b>Intangible damage (IntD)</b>       | 1      |         |         |       |        |      |       |     |
| <b>Characteristics of flood</b>       |        |         |         |       |        |      |       |     |
| Flood depth (FD)                      | -.038  | 1       |         |       |        |      |       |     |
| Flood duration (FDu <sup>a</sup> )    | -.052  | .404*** | 1       |       |        |      |       |     |
| <b>Characteristics of Building</b>    |        |         |         |       |        |      |       |     |
| Business size (BS)                    | .068   | -.150   | -.231   | 1     |        |      |       |     |
| Distance from river (DfR)             | -.238  | .322**  | .424*** | -.231 | 1      |      |       |     |
| <b>Socio-economic Characteristics</b> |        |         |         |       |        |      |       |     |
| Ownership (Ow)                        | .117   | .082    | .007    | -.028 | .137   | 1    |       |     |
| Years of Business Operations (YBO)    | -.320* | .348*   | .530*** | -.171 | .350** | .201 | 1     |     |
| Income (Inc)                          | .370** | -0.152  | -.171   | .067  | .053   | .014 | -.114 | 1   |

Note: \*. Significant at 0.1 level

\*\*. Significant at 0.05 level

\*\*\*. Significant at 0.01 level

<sup>a</sup> variable was removed due to multicollinearity between the independent variables

A negative correlation exists between the years the business operation and intangible damage, suggesting that older businesses tend to experience more intangible impacts. However, it has been argued that older businesses that have experienced flooding before may have a better coping capacity and preparedness to mitigate flood impacts (Abdullah et al., 2019). Businesses with lower income often possess fewer assets, leading to a reduced vulnerability to flood-related consequences.

The regression analysis of intangible damage over the seven independent variables revealed that the p-value associated with the regression model is 0.15, which exceeds the threshold of 0.05. The threshold p-value of 0.05 was used by other flood damage studies (Wijayanti et al., 2017; Svenningsen et al., 2020). This result leads to the acceptance of the **null hypothesis**, indicating that the factors under consideration do not significantly predict intangible damage within the business sector. This may suggest a gap in understanding how intangible impacts contribute to business losses over extended periods.

#### 4. Discussion

The variables influencing flood damage considered in this study range from flood characteristics, building type, business size, and socio-economic features of the affected area. The findings of this research demonstrate that individual variables influence intangible economic flood losses for residential buildings and business premises. For residential, like tangible damage, flood characteristics, building type, and social variables also show statistically significant contributions to intangible damage. However, unlike tangible damage, the income variable



317 does not show a statistically significant contribution to intangible damage (Kabirzad et al., 2024). A multivariate  
318 linear regression approach was employed to evaluate the contributions of independent variables and examine their  
319 associations. Multivariate analysis offers a great potential for pragmatic strategies in managing flood effects.

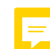

320  
321 The results of the multivariate analysis were used to assess for tangible damage before assessing intangible  
322 damage. A previous study for Peninsular Malaysia has confirmed that flood depth is one of the key physical  
323 factors providing a reliable indicator of tangible flood damage for residential buildings (Kabirzad et al., 2024),  
324 where its use in quantitative flood risk analysis has been widely practiced (e.g., Rehan & Yiwen, 2023). However,  
325 the present study found that flood depth is correlated with intangible damage, but not significantly. Other studies  
326 found that flood depth is moderately correlated with intangible damages (Lamond et al., 2015; Czajkowski &  
327 Cunha, 2020). What was discovered in the current study is that flood duration is a statistically significant  
328 explanatory factor and, therefore, it is a reliable contributor to flood damage. This discovery has confirmed that  
329 flood duration plays a crucial role in establishing the relationship between flood features and intangible impacts.  
330 A similar result was found in a previous study that flood duration has a positive correlation with a moderate  
331 contribution to the willingness-to-pay of flood mitigation measures (Czajkowski & Cunha, 2020).

332  
333 Moreover, the previous study found that among socio-economic variables, family size is a significant factor in  
334 determining tangible damage models for risk assessment for residential buildings, and this is also found to be the  
335 same for intangible damage. The findings support the hypothesis that communities characterized by bigger family  
336 sizes have a statistically significant association with the prediction of intangible damages. The findings indicate  
337 that households with fewer members have a lower propensity to contribute towards the mitigation of intangible  
338 damage. Babicky et al. (2021) support the result that household size contributes to psychological impact due to  
339 flooding, but it is not significant. The larger family size showed low willingness-to-pay for the mitigation  
340 measures, therefore, the result produced a lower contribution (Ghanbarpour et al., 2014). Low contribution of  
341 willingness-to-pay from residents can cause a challenge in supporting financial resources to propose structural  
342 mitigation. Hence, the utilization of non-structural measures costs less funding and might serve as a viable option  
343 to improve their potential in mitigation efforts.

344  
345 The present study results also demonstrated that income does not affect a household's intangible damage. The  
346 analysis reveals that households' willingness to pay for addressing psychological impacts caused by flooding is  
347 not influenced by households' monthly income. The results indicate that families prioritize addressing the mental  
348 health effects on their members regardless of their wealth or income. However, other studies have found that  
349 household monthly income shows statistically significant contribution to the willingness-to-pay for mitigating  
350 flood-related mental health impacts (Ghanbarpour et al., 2014; Yusmah et al., 2020). Addressing intangible  
351 damage, particularly psychological effects, may help households mentally prepare for flooding or improve their  
352 ability to cope with it. The integration of non-engineering measures enhances risk reduction strategies. This  
353 intervention is an effective additional method for flood management (Van Duivendijk, 2006). It is also cost-  
354 effective approach to managing flood risks, but requires the combined efforts of all stakeholders (Mishra & Sinha,  
355 2020).

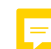



357 The connection and prediction of flood physical features and socioeconomic factors, combined with the  
358 assessment of intangible damage, can contribute to the quantification of flood risk and the identification of various  
359 mitigation strategies, particularly those that require less physical input and cause minimal environmental damage.  
360 Nevertheless, assessing intangible damages is a highly intricate activity that necessitates a comprehensive  
361 examination of the numerous elements present in flood-prone neighbourhoods. Several studies have employed the  
362 willingness-to-pay technique to measure intangible damages (Meyer et al., 2013; Ghanbarpour et al., 2014;  
363 Czajkowski & Cunha, 2020), revealing statistically significant contributions to the overall assessment of flood  
364 damage. The long-term psychological impacts underscore the necessity for implementing effective mitigation  
365 strategies to alleviate these effects on vulnerable populations.

366

367 The flood economic damage and multiple potential influencing variables were collected from various states in  
368 Peninsular Malaysia. People in the Kuala Lumpur area show strong interest in supporting willingness-to-pay  
369 initiatives for flood risk reduction activities. Some families express a willingness to allocate part of their monthly  
370 income to mitigate flooding risks driven by feelings of despair regarding their ability to survive future floods.  
371 Additionally, some households have implemented property-level structural mitigation measures to reduce the  
372 risks. Respondents in Kelantan exhibit strong religious beliefs, viewing the impact of flooding as predetermined  
373 and beyond human control. They appear less distressed by flooding events. Moreover, some respondents displayed  
374 a lack of interest in providing information, possibly due to a loss of trust because of the more frequent floods they  
375 have encountered in the northeastern region of Peninsular Malaysia, hence, they were not willing to participate in  
376 the interviews.

377

378 In most places, flooding exacerbates distress and anxiety, particularly for heads of households concerned about  
379 protecting vulnerable members, such as the elderly and children. Elderly individuals experience heightened levels  
380 of anxiety and stress as a result of flooding, especially during the night. In terms of the exposed area where the  
381 data was collected, the findings indicate that Kelantan residents live with higher flood risks due to family social  
382 conditions, emphasizing the need to improve their social resilience. To increase resilience, it is essential to  
383 implement measures such as raising awareness, enhancing early flood forecasting systems, and incorporating  
384 land-use planning.

385

386 The present study shows that the intangible damage model for businesses is insignificant for regression analysis  
387 and cannot predict the intangible damage. After a thorough literature review, few publications were found  
388 addressing business flood damage models, making it challenging to find supporting evidence in the business  
389 sector. Additionally, incorporating intangible damage into the business damage model is far more complex  
390 compared to residential intangible damage. Understanding intangible losses in the business sector proved difficult,  
391 as during observations and interviews, very few individuals were willing to provide relevant data. The limited  
392 sample size for the business sector may introduce bias and reduce the accuracy of the damage model.  
393 Consequently, the intangible impact on the business sector cannot be effectively modelled using a multivariate  
394 approach. The model for intangible damage to businesses failed to reject the null hypothesis, the independent  
395 variables do not significantly predict intangible damages. The results highlight the challenges in obtaining reliable  
396 and greater returns from respondents to assess the intangible flood damage in business premises.





## 397 5. Conclusion and recommendation

398 This study conducts the analysis on intangible damages caused by flooding based on empirical data collected from  
399 multiple places in Peninsular Malaysia. Multiple variables are considered for residential and business premises,  
400 and intangible impacts were quantified based on the contingent valuation method. The analysis showed that  
401 different income groups suffered varying impacts, and flood characteristics and social variables statistically  
402 contribute to the intangible damage.

403

404 The intangible flood damages experienced by residential households and family size findings highlight the  
405 importance of considering socio-economic variables in decision-making and planning. The family, having  
406 children, and the elderly could be priorities in the intangible damage reduction. It can also increase the resilience  
407 of the people at risk, such as children, the elderly, and women. In business premises, the micro-sized business  
408 may have suffered greater damage, but due to limitations of business respondents, the result could support a biased  
409 result to represent the accurate findings.

410

411 The flood duration and the intangible damage relation impact on residential communities, which requires  
412 community early preparedness and an effective response team to evacuate the vulnerable population. Planning  
413 preparedness and managing the response team during the flood would be a challenging task. Moreover, it  
414 emphasizes the importance of incorporating social dimensions into resilience-building efforts, such as increasing  
415 public awareness, enhancing preparedness, and engaging local communities. Additionally, it underscores the  
416 importance of non-structural measures, including flood forecasting, land use planning, and the preparation of  
417 awareness guidelines at the regional and national levels.

418

419 The present study integrates multiple variables; however, there may be additional independent variables that could  
420 influence the intangible damages. Additional samples from other places in the country can also improve the  
421 prediction accuracy of the flood damage model, particularly in the business sector's intangible damage model. To  
422 improve the accuracy of damage models in the commercial sector, others, such as agricultural, construction, and  
423 other industries, need to be included in the damage assessment. Flooding may have a significant impact on larger  
424 companies located in flood-prone areas.

425 Authors Contribution:

| Authors Name | Contribution                                                                                                                                                                 |
|--------------|------------------------------------------------------------------------------------------------------------------------------------------------------------------------------|
| S A K        | Writing (original draft preparation, review, editing), Conceptualization, Data Curation, Formal Analysis, Investigation and Methodology, Software, Validation, Visualization |
| B M R        | Writing (review and editing), Conceptualization, Supervision, Methodology, Funding Acquisitions, Validation, Visualization                                                   |
| Z Z          | Conceptualization, Supervision, Methodology                                                                                                                                  |
| B Y          | Conceptualization, Supervision, and Methodology                                                                                                                              |
| B H-B        | Conceptualization, Supervision, and Methodology                                                                                                                              |
| M E T        | Project administration, Conceptualization, and Validation                                                                                                                    |



| E C P-R | Review |
|---------|--------|
|---------|--------|

426

427

428

429

430

431

432

433

434

**Acknowledgment:** This study received financial backing from the Ministry of Higher Education Malaysia through the grant NEWTON/1/2018/WAB05/UPM/2. We extend our appreciation to all members of the Flood Impact Across Scales Project (FIAS) for their valuable contributions. Additionally, we acknowledge the support provided by the Drainage and Irrigation Department (DID), Malaysia, and the Kuala Lumpur City Authority.

Prior to the site visit for the interview, Universiti Putra Malaysia's ethical committee approved the research proposal to conduct the information.

## 435 References

436

437

438

439

440

441

442

443

444

445

446

447

448

449

450

451

452

453

454

455

456

457

458

459

460

461

462

- Abdullah, F., Mohammad, S. N., Mohamad, J., & Ahmad, M.: The Economic Model for Flood Damage Cost in Retailing Business in Malaysia. In *Proceedings of 2<sup>nd</sup> International Conference of Future ASEAN (ICoFA) 2017 - Volume 1*. [https://doi.org/10.1007/978-981-10-8730-1\\_51](https://doi.org/10.1007/978-981-10-8730-1_51), 2019
- Babicky, P., Seebauer, S., & Thaler, T.: Make it personal: Introducing intangible outcomes and psychological sources to flood vulnerability and policy. *IJDRR*, 58 (March), 102169. <https://doi.org/10.1016/j.ijdr.2021.102169>, 2021
- Czajkowski, J., & Cunha, L. K.: *Willingness to pay for flood insurance : a case study in Phang Khon, Sakon Nakhon Province, Thailand*. IOP Conf. Ser.: Earth Environ. Sci., <https://doi.org/10.1088/1755-1315/612/1/012041>, 2020
- Department of Statistics Malaysia.: Press Release Household Income & Basic Amenities Survey Report 2019. *Department of Statistics Malaysia*, 5–8. 2020
- Fatdillah, E., Rehan, B. M., Rameshwaran, P., Bell, V. A., Zulkafli, Z., Yusuf, B., & Sayers, P.: Spatial Estimates of Flood Damage and Risk Are Influenced by the Underpinning DEM Resolution : A Case Study in Kuala Lumpur, Malaysia. *Water MDPI*, 14. <https://doi.org/https://doi.org/10.3390/w14142208>, 2022.
- Frongia, S., Secchi, G. M., & Davison, M.: Tangible and Intangible Flood damage evaluation. *E3S Web of Conferences*, 7, 4–10. <https://doi.org/10.1051/e3sconf/20160705007>, 2016.
- Ghanbarpour, M. R., Saravi, M. M., & Salimi, S.: Floodplain Inundation Analysis Combined with Contingent Valuation: Implications for Sustainable Flood Risk Management. *Water Res Manag*, 28(9), 2491–2505. <https://doi.org/10.1007/s11269-014-0622-2>, 2014.
- Han, D., Huang, G., Liu, L., Zhai, M., Fu, Y., Gao, S., Li, J., & Pan, X.: Factorial CGE-Based Analysis for the Indirect Benefits of the Three Gorges Project. *Water Resources Research*, 59(4), 1–19. <https://doi.org/10.1029/2022WR033360>, 2023
- Hudson, P., Botzen, W. J. W., Poussin, J., & Aerts, J. C. J. H.: Impacts of Flooding and Flood Preparedness on Subjective Well-Being: A Monetisation of the Tangible and Intangible Impacts. *Jornl of Happiness Studies*, 20(2), 665–682. <https://doi.org/10.1007/s10902-017-9916-4>, 2017.
- Kabirzad, S. A., Rehan, B. M., Zulkafli, Z., Yusuf, B., Hasan-Basri, B., & Toriman, M. E. (2024). Examining direct and indirect flood damages in residential and business sectors through an empirical lens. *Water Sci &*



- 463 *Techn*, 90(1), 142–155. <https://doi.org/10.2166/wst.2024.202,2024>.
- 464 Kreibich, H., Seifert, I., Merz, B., & Thielen, A. H.: Development of FLEMOcs – a new model for the
- 465 estimation of flood losses in the commercial sector. *Hydro Sci Jour*, 55(8), 1302–1314.
- 466 <https://doi.org/10.1080/02626667.2010.529815>, 2010.
- 467 Lamond, J. E., Joseph, R. D., & Proverbs, D. G.: An exploration of factors affecting the long-term psychological
- 468 impact and deterioration of mental health in flooded households. *Envir Rese*, 140, 325–334.
- 469 <https://doi.org/10.1016/j.envres.2015.04.008>, 2015.
- 470 Lee, D. K. (2020). Data transformation: A focus on the interpretation. *Korean Jour of Anesthe*, 73(6), 503–508.
- 471 <https://doi.org/10.4097/kja.20137,2020>.
- 472 *Malaysia CPI Inflation Calculator*. [https://www.dosm.gov.my/cpi\\_cal/](https://www.dosm.gov.my/cpi_cal/), Last accessed: 25 Sept 2021
- 473 Malaysian Department of Irrigation and Drainage.: Final report. *Report*, 2 (December).2012
- 474 Merz, B., Kreibich, H., Schwarze, R., & Thielen, Assessment of economic flood damage. *Nat. Hazards Earth*
- 475 *Syst. Sci*. 10, 1697–1724, 2010, doi:10.5194/nhess-10-1697-2010, 2010
- 476 Meyer, V., Becker, N., Markantonis, V., Schwarze, R., Van Den Bergh, J. C. J. M., Bouwer, L. M., Bubeck, P.,
- 477 Ciavola, P., Genovese, E., Green, C., Hallegatte, S., Kreibich, H., Lequeux, Q., Logar, I., Papyrakis, E.,
- 478 Pfurtscheller, C., Poussin, J., Przyłuski, V., Thielen, A. H., & Viavattene, C.: Review article: Assessing the
- 479 costs of natural hazards-state of the art and knowledge gaps. *Nat. Hazards Earth Syst. Sci*, 13(5), 1351–1373.
- 480 <https://doi.org/10.5194/nhess-13-1351-2013>, 2013.
- 481 Mishra, K., & Sinha, R.: Flood risk assessment in the Kosi megafan using multi-criteria decision analysis: A
- 482 hydro-geomorphic approach. *Geomorphology*, 350, 106861. [https://doi.org/10.1016/j.geomorph.2019.](https://doi.org/10.1016/j.geomorph.2019.106861)
- 483 106861,2020.
- 484 N Akhir, Aun, N. S., N.Selamat, & A S. Amin.: Exploring Factors Influencing Resilience Among Flood Victims
- 485 in Malaysia.: *Intrnl Jour of Acad Rese in Busi and Soci Sci*, 11(6), 969–981.2021.
- 486 Nafari, R. H.: *Flood Damage Assessment in Urban Areas*, Ph.D thesis, Centre for Disaster Management and
- 487 Public Safety (CDMPS), The University of Melbourne, Victoria, Australia. 214 pp., 2018.
- 488 Nga, P. H., Takara, K., & Cam Van, N.: Integrated approach to analyze the total flood risk for agriculture: The
- 489 significance of intangible damages – A case study in Central Vietnam. *IJDRR*, 31(August), 862–872.
- 490 <https://doi.org/10.1016/j.ijdr.2018.08.001>, 2018
- 491 Olesen, L., Löwe, R., & Arnbjerg-Nielsen, K.: *Flood Damage Assessment - Literature Review and Application*
- 492 *to the Elster Creek Catchment*. Cooperative Research Centre for Water Sensitive Cities, 2017.
- 493 Prime Minister's Department. *Department of Statistics Malaysia Press Release* (Issue
- 494 January).[https://www.dosm.gov.my/v1/index.php?r=column/pdfPrev&id=ZlkxS0JnNThiRHk0ZllZajdyVm44U](https://www.dosm.gov.my/v1/index.php?r=column/pdfPrev&id=ZlkxS0JnNThiRHk0ZllZajdyVm44UT09)
- 495 T09, Last Accessed 15 Dec 2022.
- 496 Rehan, B. M.: Accounting for public and individual flood protection measures in damage assessment: A novel
- 497 approach for quantitative assessment of vulnerability and flood risk associated with local engineering adaptation
- 498 options. *Jour of Hydr*, 563(June), 863–873. <https://doi.org/10.1016/j.jhydrol.2018.06.061>, 2018
- 499 Rehan, M. B., & Yiwen, M.: Discrepancies in estimated flood losses on paddy production : Application of
- 500 damage models on historical flood records of the Northwest States of Peninsular Malaysia. Discrepancies in
- 501 estimated flood losses on paddy production : Application of damage model. *IOP Conference Series: Earth and*
- 502 *Environmental Science*. <https://doi.org/10.1088/1755-1315/1205/1/012020>, 2023.



- 503 Ridzuan, M. R., Razali, J. R., Abd Rahman, N. A. S., & Ju, S. Y. (2022). Youth Engagement in Flood Disaster  
504 Management in Malaysia. *Int'l Jour of Acad Resea in Busis and Soci Sci*, 12(5), 846–857.  
505 <https://doi.org/10.6007/ijarbss/v12-i5/13250.2022>.  
506 Foudi, S., Oses-Eraso, N., & I.Galarraga. (2017). Water Resources Research. *JAWRA*, 53, 5831–5844.  
507 <https://doi.org/10.1111/j.1752-1688.1969.tb04897.x>, 2017.  
508 Salleh, N., 'Aaina B., & Mustaffa, C. S. B. (2016). Examining the differences of gender on psychological well-  
509 being. *Int'l Revie of Manag and Mark*, 6(8Special Issue), 82–87, 2016.  
510 Shrestha, B. B., Kawasaki, A., & Zin, W. W. (2021). Development of flood damage assessment method for  
511 residential areas considering various house types for Bago Region of Myanmar. *IJDRR*, 66, 102602.  
512 <https://doi.org/10.1016/j.ijdr.2021.102602>, 2021.  
513 SME Corporation Malaysia. <http://smecorp.gov.my/index.php/en/policies/2020-02-11-08-01-24/sme-definition>.  
514 Last accessed. 25 Oct 2022.  
515 Svenningsen, L. S., Bay, L., Doemgaard, M. L., Halsnaes, K., Kaspersen, P. S., & Larsen, M. D.: *Beyond the*  
516 *stage-damage function: Estimating the economic damage on residential buildings from storm surges* NHES-  
517 March, pp. 1–24). <https://doi.org/10.5194/nhess-2020-30>, 2020.  
518 Van Duivendijk, J. (2006). The systematic approach to flooding problems. *Irrigation and Drainage*, 55  
519 (SUPPL. 1), 55–74. <https://doi.org/10.1002/ird.253>, 2006.  
520 Van Ootegem, L., Verhofstadt, E., Van Herck, K., & Creten, T.: Multivariate pluvial flood damage models.  
521 *EIAR*, 54, 91–100. <https://doi.org/10.1016/j.eiar.2015.05.005>, 2015.  
522 Wijayanti, P., Zhu, X., & Hellegers, P.: Estimation of river flood damages in Jakarta, Indonesia. *Nat. Hazards*,  
523 86(3), 1059–1079. <https://doi.org/10.1007/s11069-016-2730-1>, 2017.  
524 Yang, Q., Zhang, S., Dai, Q., & Yao, R.: Improved framework for assessing vulnerability to different types of  
525 urban floods. *Sustainability (Switzerland)*, 12(18). <https://doi.org/10.3390/su12187668>, 2020.  
526 Yusmah, M. Y. S., Bracken, L. J., Sahdan, Z., Norhaslina, H., Melasutra, M. D., Ghaffarianhoseini, A.,  
527 Sumiliana, S., & Farisha, A. S. S.: Understanding urban flood vulnerability and resilience : a case study of  
528 Kuantan, Pahang, Malaysia. *Nat.Hazards*, 101(2), 551–571. <https://doi.org/10.1007/s11069-020-03885-1>, 2020.  
529 Zahari, N. Z., & Hashim, A. M.: Adequacy of Flood Relief Shelters: A Case Study in Perak, Malaysia. *E3S Web*  
530 *of Conferences*, 34 (December 2014), 1–8. <https://doi.org/10.1051/e3sconf/20183402016>, 2018.  
531
